# Supplementary material for: Neonatal AAV delivery of alpha-synuclein induces pathology in the adult mouse brain
Source: PubMed Central journal article supplement (PMC5481919; doi:10.1186/s40478-017-0455-3), 2017-06-23

Figure S1.

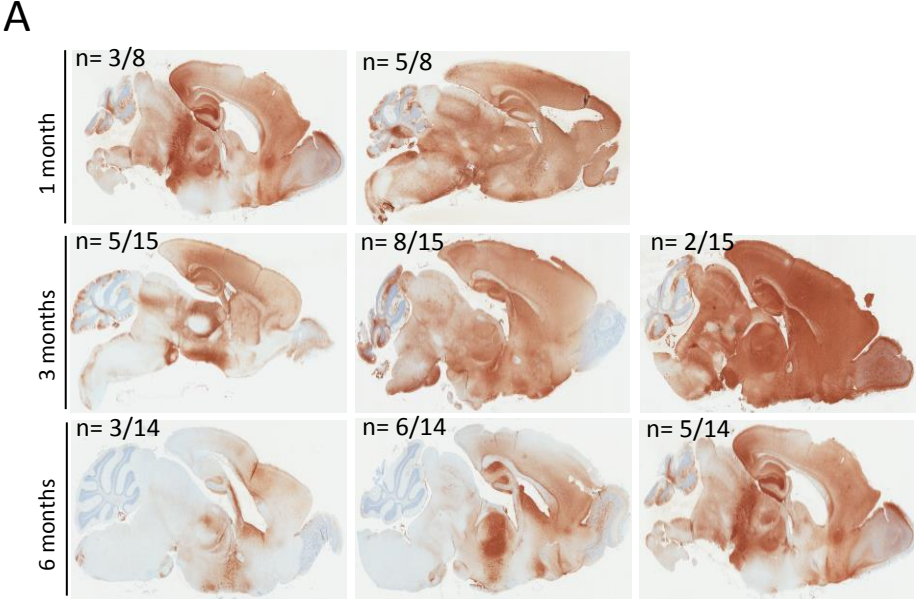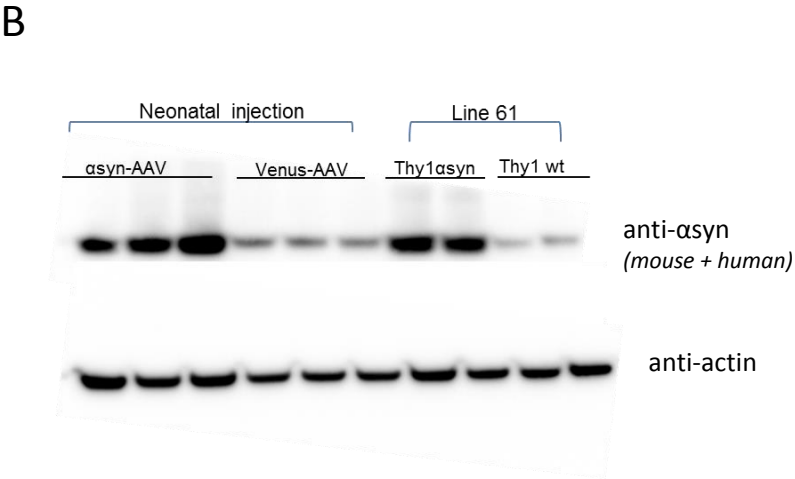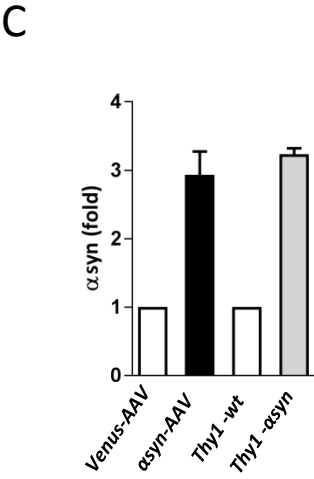

Supplement: 40478_2017_455_MOESM1_ESM.pdf [file 40478_2017_455_MOESM1_ESM.pdf]
