# Supplementary material for: Neonatal AAV delivery of alpha-synuclein induces pathology in the adult mouse brain
Source: Springer Nature journal article supplement (doi:10.1186/s40478-017-0455-3), 2017-06-23

Figure S2.

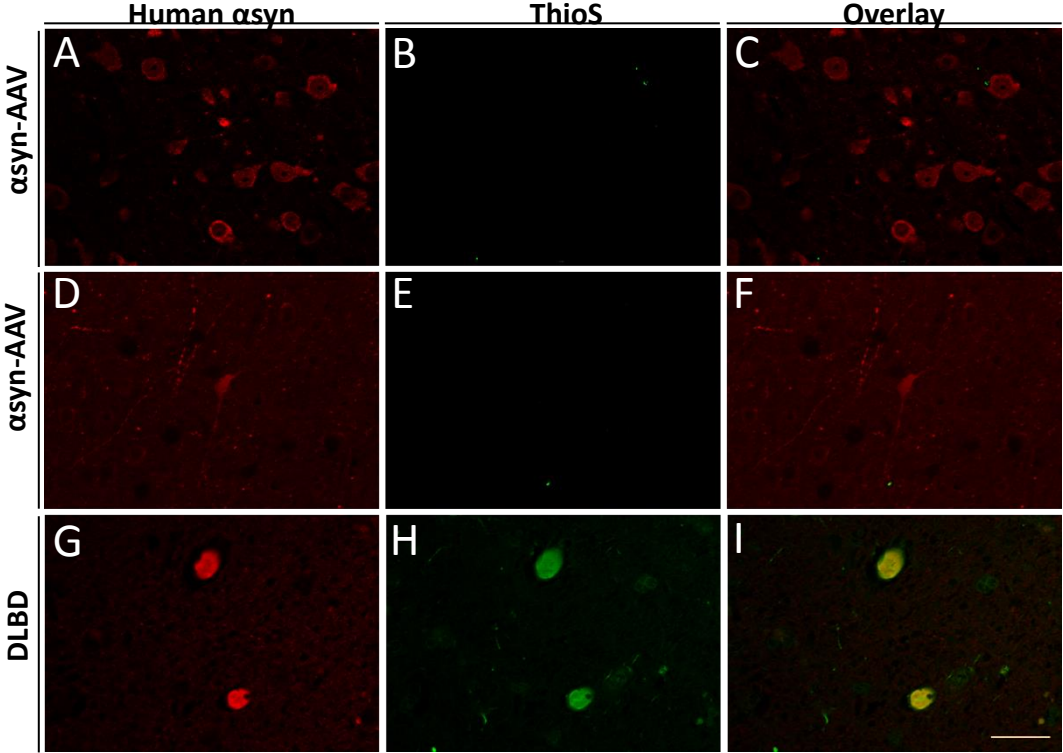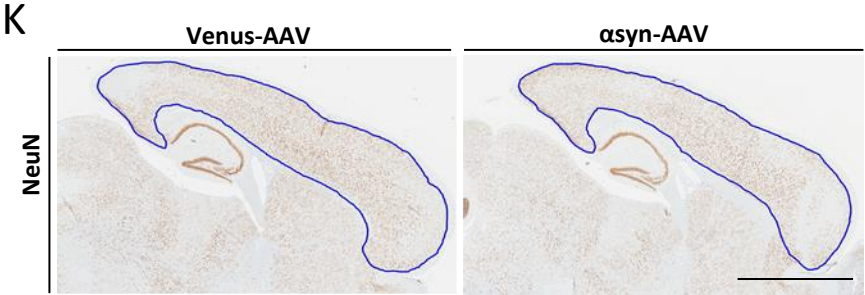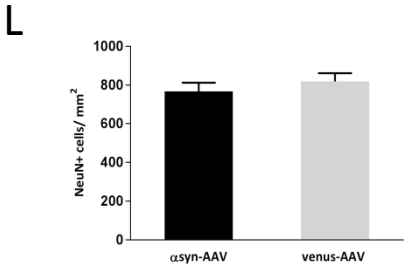

Supplement: MOESM2 [file 25666224]
